# Supplementary material for: Bidirectional process prediction in the laser-induced-graphene production using blackbox deep learning
Source: Research Square preprint supplement (doi:10.21203/rs.3.rs-7917178/v1), 2025-11-13
Supplement: Supplementary file 1 [file 26ca31a356893cc1b246e38e.pdf]

# Bidirectional process prediction in the laser-induced-graphene production using blackbox deep learning

Maxim Polomoshnov<sup>1\*</sup>, Nitheesh M. Nair<sup>1</sup>, Gerardo Hernandez-Sosa<sup>1,2,3,4</sup>, Markus Reischl<sup>1</sup>

<sup>1</sup> Institute for Automation and Applied Informatics, Karlsruhe Institute of Technology, Hermann-von-Helmholtz-Platz 1, 76344 Eggenstein-Leopoldshafen, Germany

<sup>2</sup> Light Technology Institute, Karlsruhe Institute of Technology, Engesserstr. 13, 76131 Karlsruhe, Germany

<sup>3</sup> InnovationLab, Speyerer Str. 4, 69115 Heidelberg, Germany

<sup>4</sup> Institute of Microstructure Technology, Karlsruhe Institute of Technology, Hermann-von-Helmholtz-Platz 1, 76344 Eggenstein-Leopoldshafen, Germany

\* Corresponding author. E-mail: maxim.polomoshnov@kit.edu

## Supplementary Information

### Supplementary Note S1. Blackbox Deep Learning

The engineering paradigm demands on a maximum transparency and the complete understanding of decision-making in any related process, to prove its reliability. Therefore, the input-to-output data transformation has to be fully interpretable and explainable<sup>16,17,21</sup>. A fully-parametric model forms a whitebox data transformer as a core of the analytical approach, indicated in Fig. S1. It requires an extended prior knowledge, including a deep analysis of related model features, of the decision-making transparency, and of the interim data visualization<sup>10,18,19</sup>. The knowledge also includes detailed submodels, the physics-informed approach, and digital-twin models to simulate physical rules of the real world. As a result, the model decision has to be completely explainable, and the output data completely reliable. In fact, design and tuning of a whitebox model is an intricate task, demanding on time and personnel qualification<sup>18,19,25</sup>. Hence, the approach is merely overcomplicated for the tasks that are possible to approximate with plain equations, such as interrelation of the applied energy, and dimensional, functional, and quality properties of laser-induced graphene (LIG) lines.

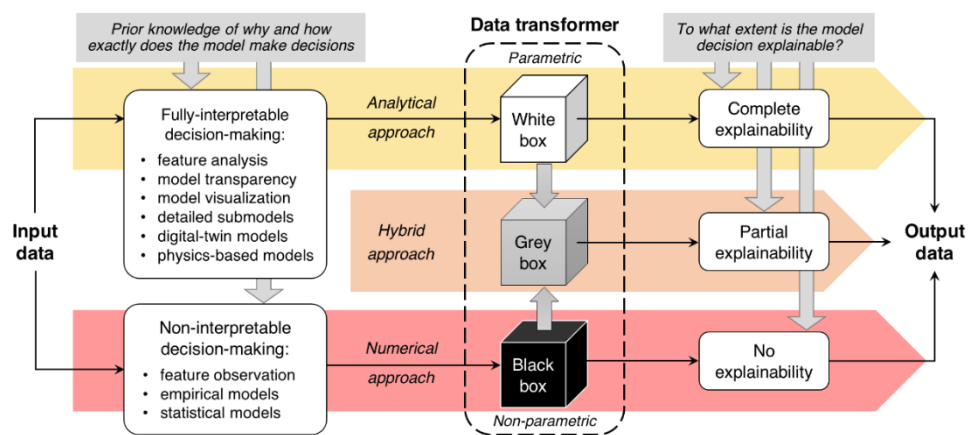

Supplementary Fig. S1. Schematic of the white, grey, and blackbox approaches to data transformation in decision-making models in machine-learning. Combined and adapted from <sup>14,15,17–20</sup>.

With respect to deep learning (DL), a multilayer perceptron (MLP) forms a simple blackbox data transformer, interlinking input and output data directly, without any prior knowledge of the underlying process<sup>13–15,28</sup>. Although it offers limited interpretability, the approach is adequate for plain LIG-fabrication tasks, where sophisticated physical modelling is impractical for economic reasons<sup>22,25</sup>. Thus, the employment of MLP to predict the input-output correlation in the LIG-based fabrication is expected to be a promising and powerful method.

# *Fabricated and assembled samples*

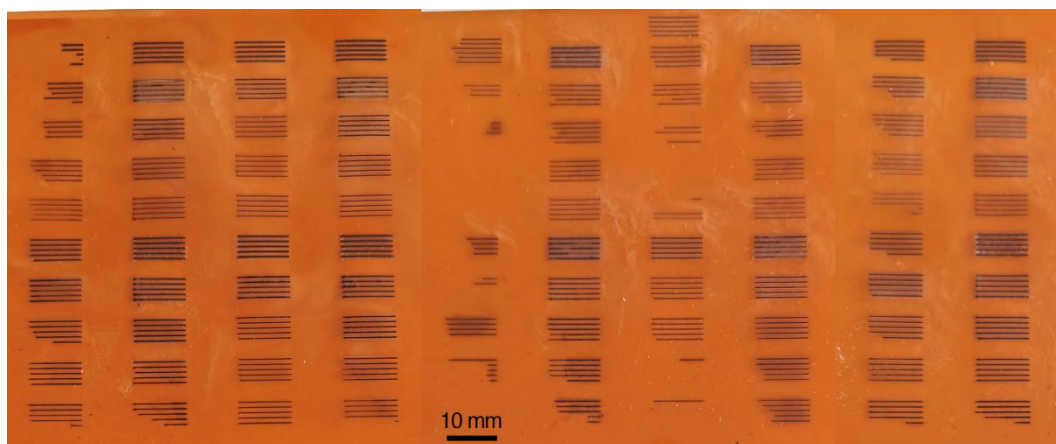

Supplementary Fig. S2. Combined digital photos of fabricated training lines, after detachment of the substrate (the scale is equal).

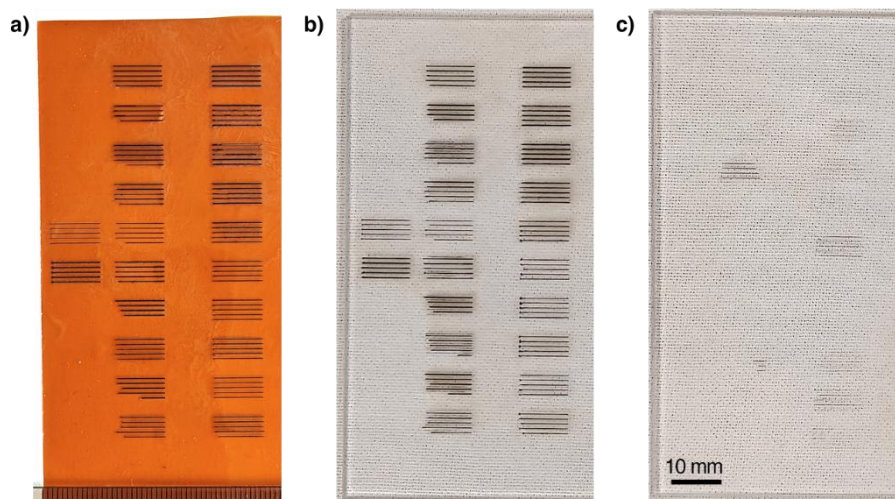

Supplementary Fig. S3. Digital photos of fabricated validation lines, after detachment of the substrate (the scale is equal). **a)** Patterned substrate, **b)** top glass slide, **c)** bottom glass slide. Partly delaminated graphene transferred from the substrate and caused a significant variance in the measured line resistance is clearly visible in **b–c**.

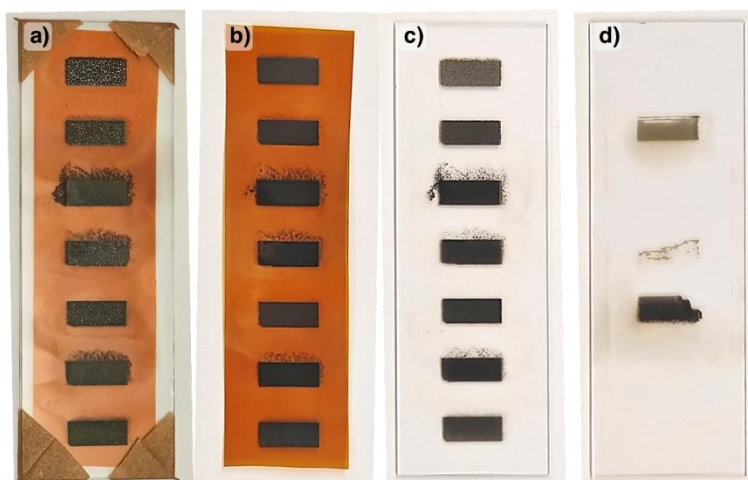

Supplementary Fig. S4. Digital photos of fabricated validation rectangles, using the direct-prediction workflow. **a)** Substrate assembly, **b)** patterned substrate, **c)** top glass slide, **d)** bottom glass slide. Partly delaminated graphene transferred from the substrate and corrupted two of the rectangles is clearly visible in **c–d**. Dimensions of the glass slides are  $75 \times 25 \text{ mm}^2$ , with the same scale for all images.

Supplementary Table S1. Input and output laser-beam parameters and product properties, mutually applied and collected for fabrication and evaluation of validation samples.

| Laser-beam parameters and product properties                                 | Value range        |                   |                    |                 |
|------------------------------------------------------------------------------|--------------------|-------------------|--------------------|-----------------|
|                                                                              | Lines              |                   | Rectangles         |                 |
|                                                                              | Direct             | Inverse           | Direct             | Inverse         |
| Laser power $P$ [W]                                                          | 4.6–13.0           | <u>6.6–10.4</u>   | 4.0–11.6           | <u>4.8–8.6</u>  |
| Laser movement speed across the substrate $v$ [mm/s]                         | 37–166             | <u>50.7–114.9</u> | 45–150             | <u>45–150</u>   |
| Laser-beam defocus $D$ [mm]                                                  | -0.4–0.3           | <u>-0.1–0.1</u>   | -0.5–0.3           | <u>-0.4–0.3</u> |
| Linear resistance $R$ [ $\Omega$ /mm], or (Resistance $R_{eq}$ [ $\Omega$ ]) | <u>14.8–339.2</u>  | 21.0–135.0        | <u>(11.0–81.5)</u> | (10.9–87.8)     |
| Line width $W$ [ $\mu$ m]                                                    | <u>184.8–267.4</u> | 124.0–286.0       |                    |                 |
| Line quality $Q$ [1]                                                         | <u>“0” or “1”</u>  | “0” or “1”        | <u>“0” or “1”</u>  | “0” or “1”      |

Note: The underlined values denote output data, the regular ones indicate input data.

### Analysis of the training lines

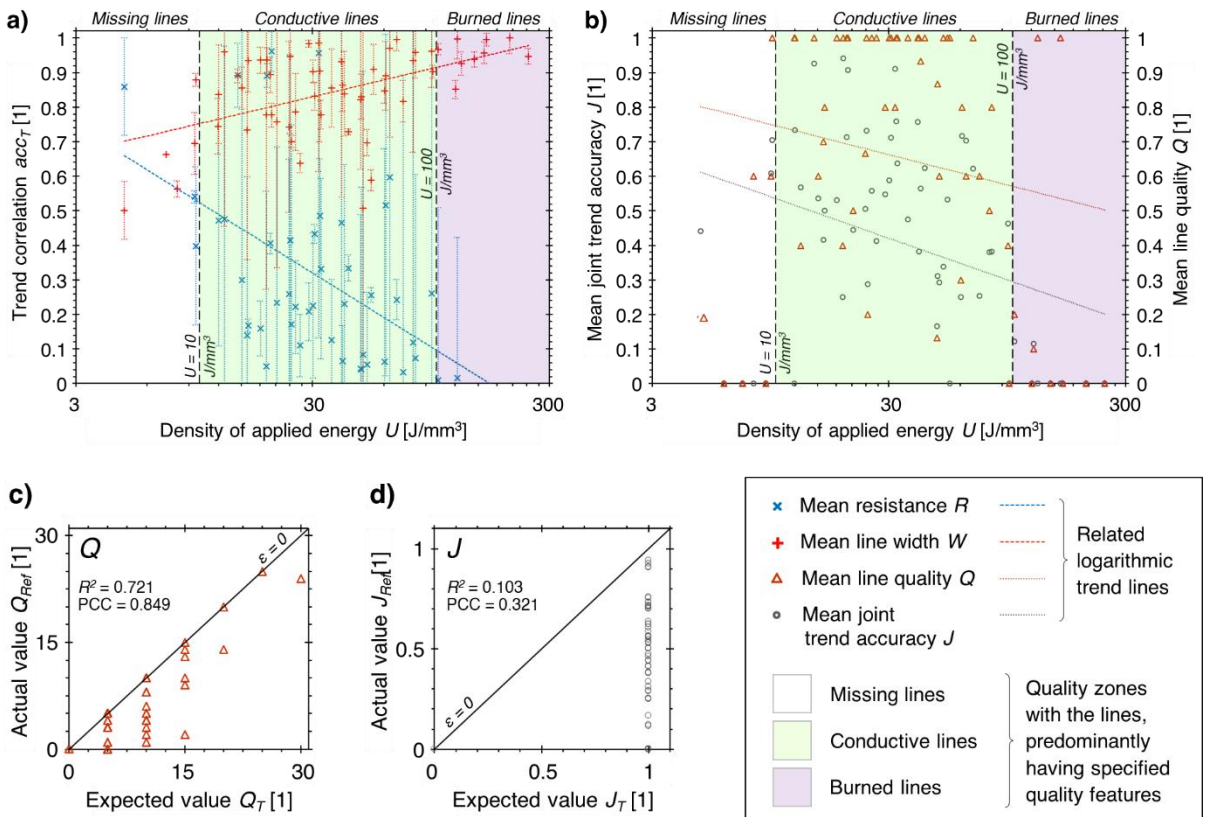

Supplementary Fig. S5. Analysis of the training lines (dataset A<sup>32</sup>). **a–b** Data distribution and identified quality zones, with respect to the applied density of laser energy  $U$ : **a** trend correlation for the linear resistance  $R$  and the line width  $W$ , and **b** data distribution for the line quality  $Q$  and the joint trend correlation  $J$ . For discrete  $Q$  and  $J$ , variance and error bars were omitted. Three zones were detected from the  $Q$  values: predominantly missing ( $U \approx 10$  J/mm<sup>3</sup>), conductive ( $10 \text{ J/mm}^3 \lesssim U \lesssim 100 \text{ J/mm}^3$ ), and burned ( $U \gtrsim 100$  J/mm<sup>3</sup>) lines. **c–d** Individual correlation scatter plots for **c**  $Q$  and **d**  $J$ . Diagonal lines  $\epsilon = 0$  represent the complete match. In **c**, axes are graduated with the total number of samples related to the same  $U$  value. In **d**, the expected value was 0 or 1. Corresponding values of  $R^2$  and of the Pearson correlation coefficient (PCC) are indicated.

Supplementary Table S2. Accuracy metrics for the training lines (dataset A<sup>32</sup>), in [1], n=500.

| Metrics           | <i>R</i>          | <i>W</i>          | <i>Q</i>          | <i>J</i>          |
|-------------------|-------------------|-------------------|-------------------|-------------------|
| $acc_T$           | $0.313 \pm 0.262$ | $0.844 \pm 0.125$ | $0.767 \pm 0.380$ | $0.529 \pm 0.289$ |
| <i>Regression</i> | $0.329 \pm 0.290$ | $0.666 \pm 0.296$ | $0.001 \pm 0.001$ | $0.454 \pm 0.324$ |
| $R^2$             | 0.192             | 0.490             | 0.721             | 0.103             |
| PCC               | 0.438             | 0.700             | 0.849             | 0.321             |

### Analysis of the validation lines

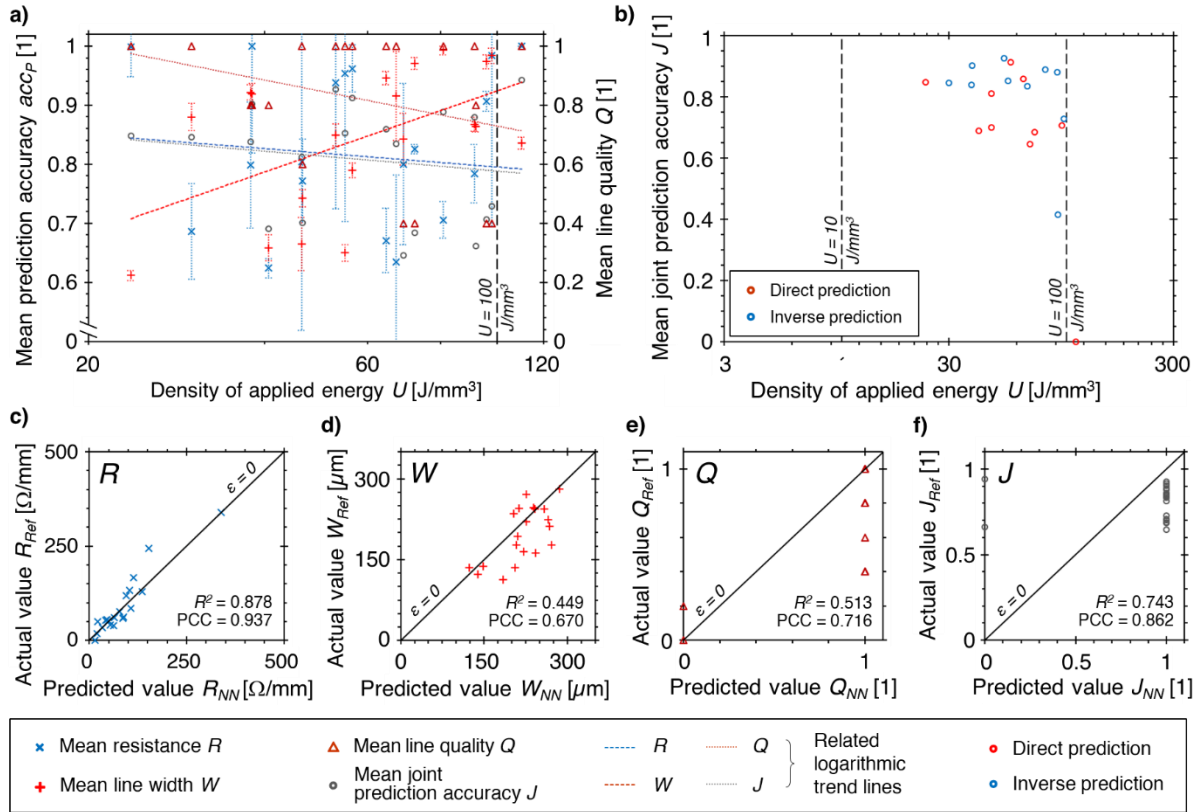

Supplementary Fig. S6. Analysis of the validation lines (dataset B<sup>32</sup>). **a** Mean prediction accuracy for the linear resistance  $R$ , the line width  $W$ , the line quality  $Q$ , and the joint accuracy  $J$ , with respect to the applied density of laser energy  $U$ . **b** Mean joint prediction accuracy  $J$ , with respect to  $U$  and to direction of the prediction workflow. **c–f** Individual correlation scatter plots for **c**  $R$ , **d**  $W$ , **e**  $Q$ , and **f**  $J$ . Diagonal lines  $\epsilon = 0$  represent the complete match. Corresponding values of  $R^2$  and of the Pearson correlation coefficient (PCC) are indicated.

Supplementary Table S3. Accuracy metrics for the validation lines (dataset B<sup>32</sup>), in [1], n=100.

| Metrics           | <i>R</i>          | <i>W</i>          | <i>Q</i>          | <i>J</i>          |
|-------------------|-------------------|-------------------|-------------------|-------------------|
| $acc_P$           | $0.813 \pm 0.154$ | $0.844 \pm 0.117$ | $0.820 \pm 0.236$ | $0.808 \pm 0.094$ |
| <i>Regression</i> | $0.592 \pm 0.315$ | $0.784 \pm 0.176$ | $0.795 \pm 0.388$ | $0.627 \pm 0.319$ |
| $R^2$             | 0.878             | 0.449             | 0.513             | 0.743             |
| PCC               | 0.937             | 0.670             | 0.716             | 0.862             |



### Analysis of the validation rectangles

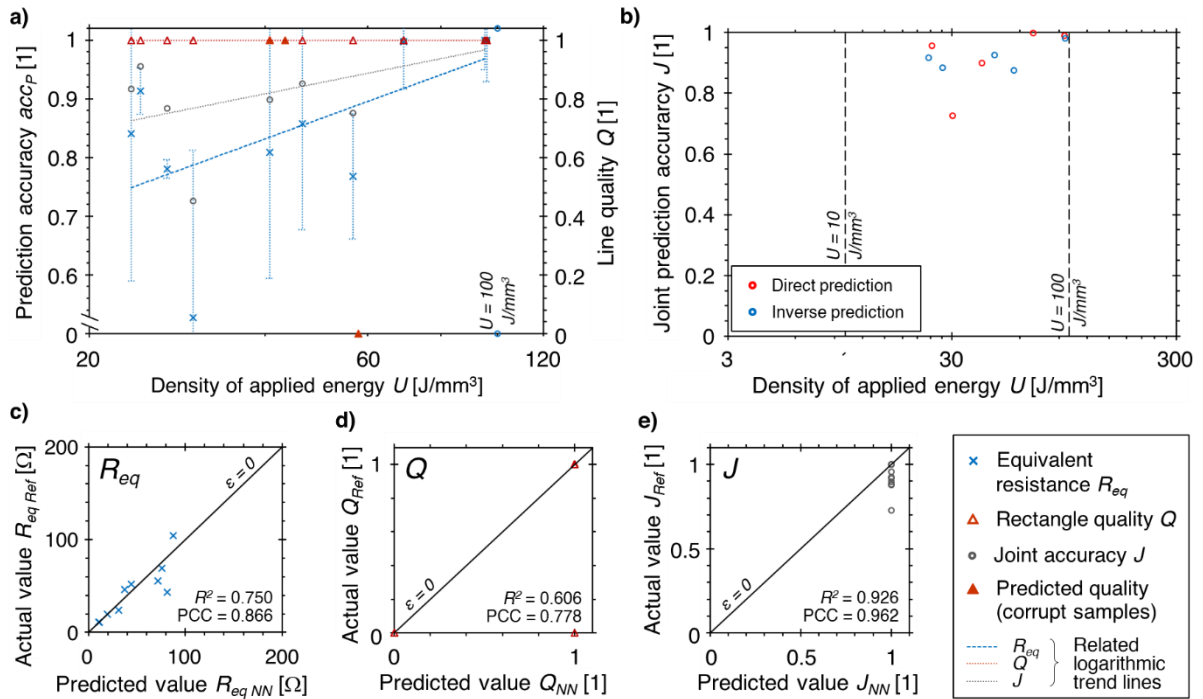

Supplementary Fig. S7. Analysis of the validation rectangles (dataset C<sup>32</sup>). **a** Prediction accuracy for the equivalent resistance  $R_{eq}$ , the rectangle quality  $Q$ , and the joint accuracy  $J$ , with respect to the applied density of laser energy  $U$ . **b** Mean joint prediction accuracy  $J$ , with respect to  $U$  and to direction of the prediction workflow. **c–e** Individual correlation scatter plots for **c**  $R_{eq}$ , **d**  $Q$ , and **e**  $J$ . Diagonal lines  $\varepsilon = 0$  represent the complete match. Corresponding values of  $R^2$  and of the Pearson correlation coefficient (PCC) are indicated.

Supplementary Table S4. Accuracy metrics for the validation rectangles (dataset C<sup>32</sup>), in [1],  $n=10$ .

| Metrics    | $R_{eq}$          | $Q$               | $J$               |
|------------|-------------------|-------------------|-------------------|
| $acc_p$    | $0.849 \pm 0.137$ | $0.923 \pm 0.266$ | $0.918 \pm 0.078$ |
| Regression | $0.749 \pm 0.137$ | $0.538 \pm 0.458$ | $0.585 \pm 0.149$ |
| $R^2$      | 0.750             | 0.606             | 0.926             |
| PCC        | 0.866             | 0.778             | 0.962             |

### Analysis of the twofold control

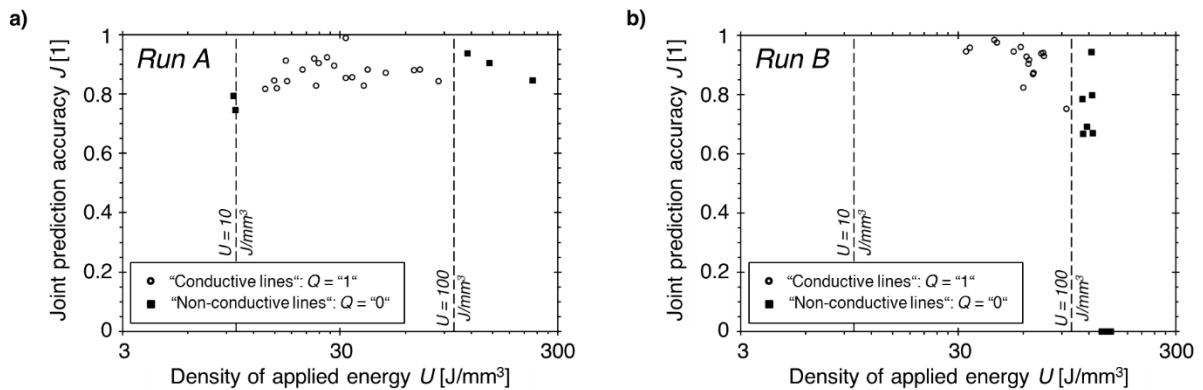

Supplementary Fig. S8. Analysis of the twofold control (dataset D<sup>32</sup>). Mean joint prediction accuracy  $J$ , with respect to  $U$  and to related quality zones: **a** in the run A (restoration of the laser-beam parameters), and **b** in the run B (restoration of the product properties).

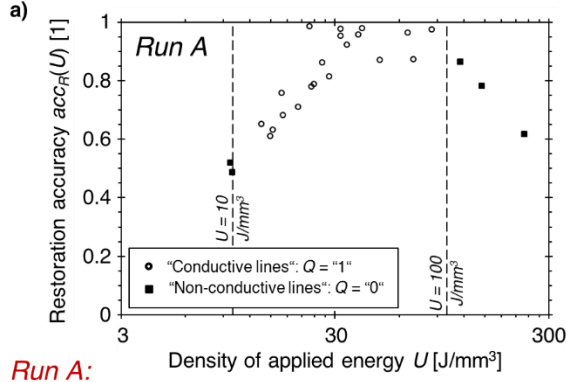

*Run A:*

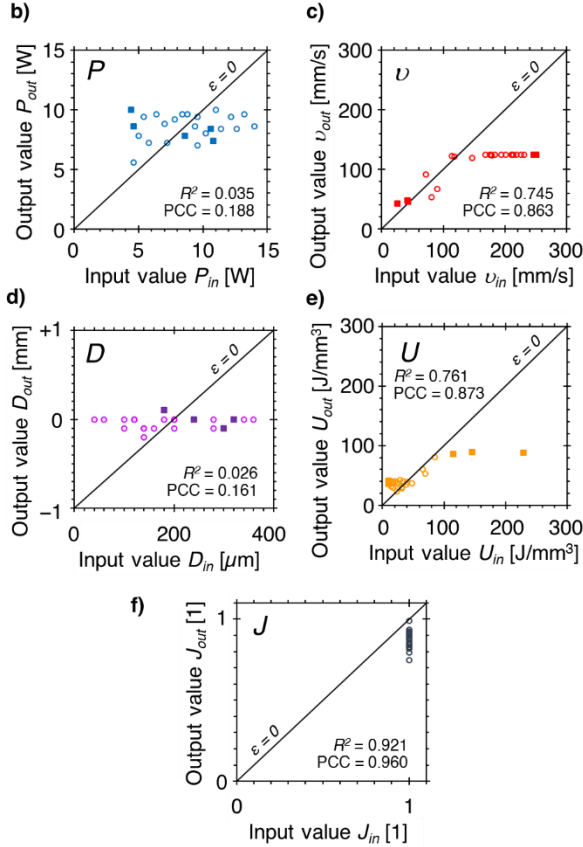

*Run B:*

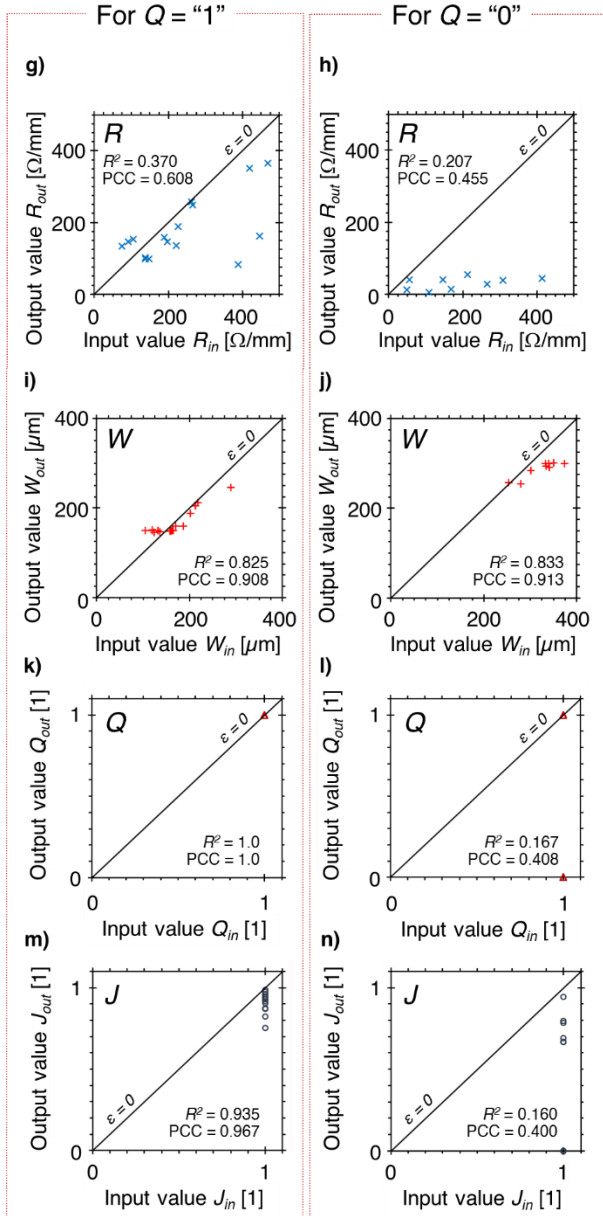

All variables in the *Run A*, with respect to quality zones:

- ■ Joint restoration accuracy  $J$ , and restoration accuracy of  $U$
- ■ Laser power  $P$
- ■ Laser-movement speed across the substrate  $v$
- ■ Laser-beam defocus  $D$
- ■ Density of applied energy  $U$

- "Conductive lines":  $Q = "1"$      ■ "Non-conductive lines":  $Q = "0"$

In the *Run B*:

- × Linear resistance  $R$
- + Line width  $W$
- △ Line quality  $Q$
- Restoration accuracy  $J$

Supplementary Fig. S9. Analysis of the twofold control (dataset D<sup>32</sup>). **a** Restoration accuracy of the applied density of laser energy  $U$ , with respect to its value, in the run A. **b–n** Individual correlation scatter plots for **b** laser power  $P$ , **c** movement speed across the substrate  $v$ , **d** laser-beam defocus  $D$ , **e**  $U$ , **f** joint restoration accuracy  $J$  in the run A, **g–h** linear resistance  $R$ , **i–j** line width  $W$ , **k–l** line quality  $Q$ , **m–n** joint restoration accuracy  $J$  in the run B. The plots in **g**, **i**, **k**, and **m** indicate results for the quality zone "conductive lines", in **h**, **j**, **l**, and **n** for "non-conductive lines", such as missing and burned ones. Diagonal lines  $\epsilon = 0$  represent the complete match. The plots in **b–f** are related to the run A (restoration of the laser-beam parameters), in **g–n** to the run B (restoration of the product properties). Corresponding values of  $R^2$  and of the Pearson correlation coefficient (PCC) are indicated.

Supplementary Table S5. Accuracy metrics for the twofold control (dataset E, run A<sup>32</sup>), depending on the quality zone, in [1].

| Quality zone                       | Metrics                | <i>P</i>      | <i>ν</i>      | <i>D</i>      | <i>J</i>      | <i>U</i>      |
|------------------------------------|------------------------|---------------|---------------|---------------|---------------|---------------|
| All lines,<br>n = 25               | <i>acc<sub>P</sub></i> | 0.765 ± 0.138 | 0.681 ± 0.137 | 0.848 ± 0.092 | 0.868 ± 0.050 | 0.802 ± 0.149 |
|                                    | <i>Regression</i>      | 0.856 ± 0.081 | 0.426 ± 0.195 | 0.822 ± 0.109 | 0.669 ± 0.249 | 0.068 ± 0.557 |
|                                    | <i>R</i> <sup>2</sup>  | 0.035         | 0.745         | 0.026         | 0.921         | 0.761         |
|                                    | PCC                    | 0.188         | 0.863         | 0.161         | 0.960         | 0.873         |
| Conductive lines,<br>n = 20        | <i>acc<sub>P</sub></i> | 0.789 ± 0.118 | 0.681 ± 0.121 | 0.850 ± 0.098 | 0.874 ± 0.041 | 0.838 ± 0.126 |
|                                    | <i>Regression</i>      | 0.872 ± 0.111 | 0.460 ± 0.158 | 0.764 ± 0.147 | 0.748 ± 0.286 | 0.528 ± 0.301 |
|                                    | <i>R</i> <sup>2</sup>  | 0.142         | 0.549         | 0.041         | 0.955         | 0.658         |
|                                    | PCC                    | 0.376         | 0.741         | 0.201         | 0.977         | 0.811         |
| Missing and burned lines,<br>n = 5 | <i>acc<sub>P</sub></i> | 0.672 ± 0.169 | 0.680 ± 0.187 | 0.842 ± 0.063 | 0.845 ± 0.070 | 0.655 ± 0.147 |
|                                    | <i>Regression</i>      | 0.845 ± 0.070 | 0.243 ± 0.376 | 0.616 ± 0.210 | 0.620 ± 0.197 | 0.322 ± 0.301 |
|                                    | <i>R</i> <sup>2</sup>  | 0.589         | 0.999         | 0.484         | 0.961         | 0.803         |
|                                    | PCC                    | -0.767        | 0.999         | -0.696        | 0.980         | 0.896         |

Supplementary Table S6. Accuracy metrics for the twofold control (dataset E, run B<sup>32</sup>), depending on the quality zone, in [1].

| Quality zone                       | Metrics                | <i>R</i>      | <i>W</i>      | <i>Q</i>      | <i>J</i>      |
|------------------------------------|------------------------|---------------|---------------|---------------|---------------|
| All lines,<br>n = 25               | <i>acc<sub>P</sub></i> | 0.523 ± 0.301 | 0.887 ± 0.064 | 0.880 ± 0.325 | 0.768 ± 0.299 |
|                                    | <i>Regression</i>      | 0.432 ± 0.284 | 0.811 ± 0.101 | 0.880 ± 0.325 | 0.745 ± 0.290 |
|                                    | <i>R</i> <sup>2</sup>  | 0.238         | 0.953         | 0.220         | 0.203         |
|                                    | PCC                    | 0.488         | 0.976         | 0.469         | 0.450         |
| Conductive lines,<br>n = 16        | <i>acc<sub>P</sub></i> | 0.696 ± 0.191 | 0.885 ± 0.070 | 1.0 ± 0.0     | 0.915 ± 0.056 |
|                                    | <i>Regression</i>      | 0.641 ± 0.210 | 0.813 ± 0.120 | 1.0 ± 0.0     | 0.821 ± 0.105 |
|                                    | <i>R</i> <sup>2</sup>  | 0.370         | 0.825         | 1.0           | 0.935         |
|                                    | PCC                    | 0.608         | 0.908         | 1.0           | 0.967         |
| Missing and burned lines,<br>n = 9 | <i>acc<sub>P</sub></i> | 0.214 ± 0.193 | 0.891 ± 0.051 | 0.667 ± 0.471 | 0.506 ± 0.367 |
|                                    | <i>Regression</i>      | 0.051 ± 0.039 | 0.752 ± 0.100 | 0.667 ± 0.471 | 0.472 ± 0.342 |
|                                    | <i>R</i> <sup>2</sup>  | 0.207         | 0.833         | 0.167         | 0.160         |
|                                    | PCC                    | 0.455         | 0.913         | 0.408         | 0.400         |

### Supplementary Note S2. Demonstrator

The full resistance of each LIG electrode  $R_{LIG}$  was defined as in Equation S1. Then, the required linear resistance  $R_{LIG}^*$  and line width  $W_{LIG}^*$  were found as in Equations S2 and S3, respectively.

$$R_{LIG} = \frac{1}{2} \cdot \frac{V_{DD} - V_{LED}}{I_{LED}}, \quad [\Omega], \quad (S1)$$

with  $V_{DD} = 5 \text{ V}$  — power-source voltage,  
 $V_{LED} = 1.8 \text{ V}$ ,  $I_{LED} = 2 \text{ mA}$  — LED voltage and current, correspondingly.

$$R_{LIG}^* = \frac{R_{LIG}}{l_{LIG}}, \quad [\Omega/mm], \quad (S2)$$

with  $l_{LIG} = 20 \text{ mm}$  — single-electrode length, chosen for functional reasons.

$$W_{LIG}^* = \frac{l_{LIG}}{\sigma_{LIG} \cdot R_{LIG} \cdot t_{PI} \cdot \alpha} \cdot 10^6, \quad [\mu m], \quad (S3)$$

with  $\sigma_{LIG} = 15 \text{ S/cm}$  — approximated LIG conductivity<sup>35–37</sup>,  
 $t_{PI} = 75 \mu m$  — substrate thickness,  
 $\alpha = 0.9$  — non-squareness correction factor for the cross-section area.

### Supplementary Note S3. Comparison to literature

In Table S7, outcomes of the present work are compared to the related results reported in literature. For each work, *application field*, *employed model*, and *dataset size* are pointed out. The *ML subset* specifies belonging of the model to the ML or DL field, and indicates its vision-based focus, where appropriate. The *plain workflow* indicates whether a simplistic approach was utilized, or the model employed any complex workflow, such as using of physics-informed data, multiple-model frameworks, Bayesian optimization of hyperparameters; or required an extensive prior knowledge on the underlying process, or sophisticated analytical equipment. *Prefiltered data* labels conducted sample preselection to process merely high-quality data, aimed to increase reported prediction accuracy. Noted *classification task* means a simplified result-qualification objective, which is usually less demanding, and ensures a higher prediction accuracy than regression analysis (i.e., result-quantification objective). Among multiple *reported mean accuracies*, the highest one was chosen and listed in Table S7 for each work, according to the employed model. For significantly distinct outcomes of one work, all corresponding results were outlined.



Supplementary Table S7. Comparison to literature.

| Reference    | Application field                               | Employed model                                       | ML subset        | Plain workflow | Dataset size [samples] | Prefiltered data | Classification task | Reported mean accuracy, or indicated metrics  |
|--------------|-------------------------------------------------|------------------------------------------------------|------------------|----------------|------------------------|------------------|---------------------|-----------------------------------------------|
| Present work | LIG                                             | Blackbox MLP model, double-direction                 | DL               | Yes            | 500                    | No               | No                  | 80.8 % – 94.8 %                               |
|              |                                                 |                                                      |                  |                |                        |                  |                     | $R^2 = 0.74\text{--}0.96$                     |
|              |                                                 |                                                      |                  |                |                        |                  |                     | $PCC = 0.86\text{--}0.98$                     |
| 9            | Fluoride-doped LIG                              | Bayesian-optimized Gaussian Process Regression model | ML               | No             | 201                    | Yes              | No                  | 89.7 %                                        |
| 11           | LIG                                             | Random Forest and XGB framework                      | ML               | No             | 570                    | Yes              | No                  | 91.25 %                                       |
| 12           | LIG                                             | Digital-twin, single-layer MLP model                 | ML               | No             | 648                    | Yes              | Yes                 | 96.9 % (resistance)                           |
|              |                                                 |                                                      |                  |                |                        |                  | No                  | 88.9 % (morphology)                           |
|              |                                                 |                                                      |                  |                |                        |                  |                     | $R^2 = 0.91$                                  |
| 22           | LIG                                             | Twofold transfer learning model                      | DL, vision-based | No             | 500                    | No               | Yes                 | 95.4 %                                        |
| 23           | Flash graphene                                  | Digital-twin, physics-informed multi-NN framework    | ML               | No             | 173                    | Yes              | No                  | $R^2 = 0.81$                                  |
| 24           | LIG                                             | K-Nearest Neighbors model                            | ML               | Yes            | 103                    | Yes              | No                  | 94.3 %                                        |
| 26           | Flash graphene                                  | XGB model                                            | ML               | Yes            | > 20,000               | No               | No                  | $R^2 = 0.80$                                  |
| 27           | Nickel-graphene nanocomposites                  | Long short-term memory model                         | DL               | No             | 48,600                 | No               | No                  | $PCC = 0.95$                                  |
| 28           | Inkjet printing                                 | Twofold physics-informed MLP model                   | DL               | No             | 883,000                | No               | Yes                 | $R^2 = 0.98$                                  |
| 29           | Inkjet printing                                 | Physics-informed framework                           | DL, vision-based | No             | 10,800                 | No               | Yes, partly         | Similarity index = 0.862                      |
| 30           | Additive manufacturing: laser powder bed fusion | Physics-informed MLP model, double-direction         | DL               | No             | 103                    | Yes              | No                  | 59.0 % (on pure physically-manufactured data) |
|              |                                                 |                                                      |                  |                |                        |                  |                     | 96.6 % (on hybrid physics-informed data)      |
